# Supplementary material
Source: Springer Nature journal article supplement (https://www.springermedizin.de/resource/supplementary/13054_2011_9712_MOESM2_ESM.pdf/9706826)
Supplement: MOESM2 [file 9706826]

234 Articles evaluated

50 not evaluating Pharmacokinetics  
10 Pharmacokinetic models  
1 non iv route  
19 not  $\beta$ -Lactams  
21 elective prophylaxis use

15 children only  
3 non humans  
15 non critically ill patients  
2 single patient Pharmacokinetics  
7 non english language

15 articles selected from reference  
articles bibliography

35 Use of Renal Replacement Therapy

71 Articles further assessed

Antibiotics with less than 5  
published studies (14):

Cefoxitin 1  
Apalcillin 1  
Flucloxacillin 1  
Cefmenoxime 1  
Cefixime 1  
Co-amoxiclav 1  
Ertapenem 2  
Temoxicillin 1  
Ceftriaxone 3  
Mezlocillin 1  
Cefodizime 1

57 studies included
